# Supplementary material
Source: publisher figshare collection journal article supplement (https://diabetesjournals.figshare.com/ndownloader/files/27968022)

Supplemental Figure 1. U.S. Map of the Percent of the Population Residing in Urban Areas by County Based on Census 2010.

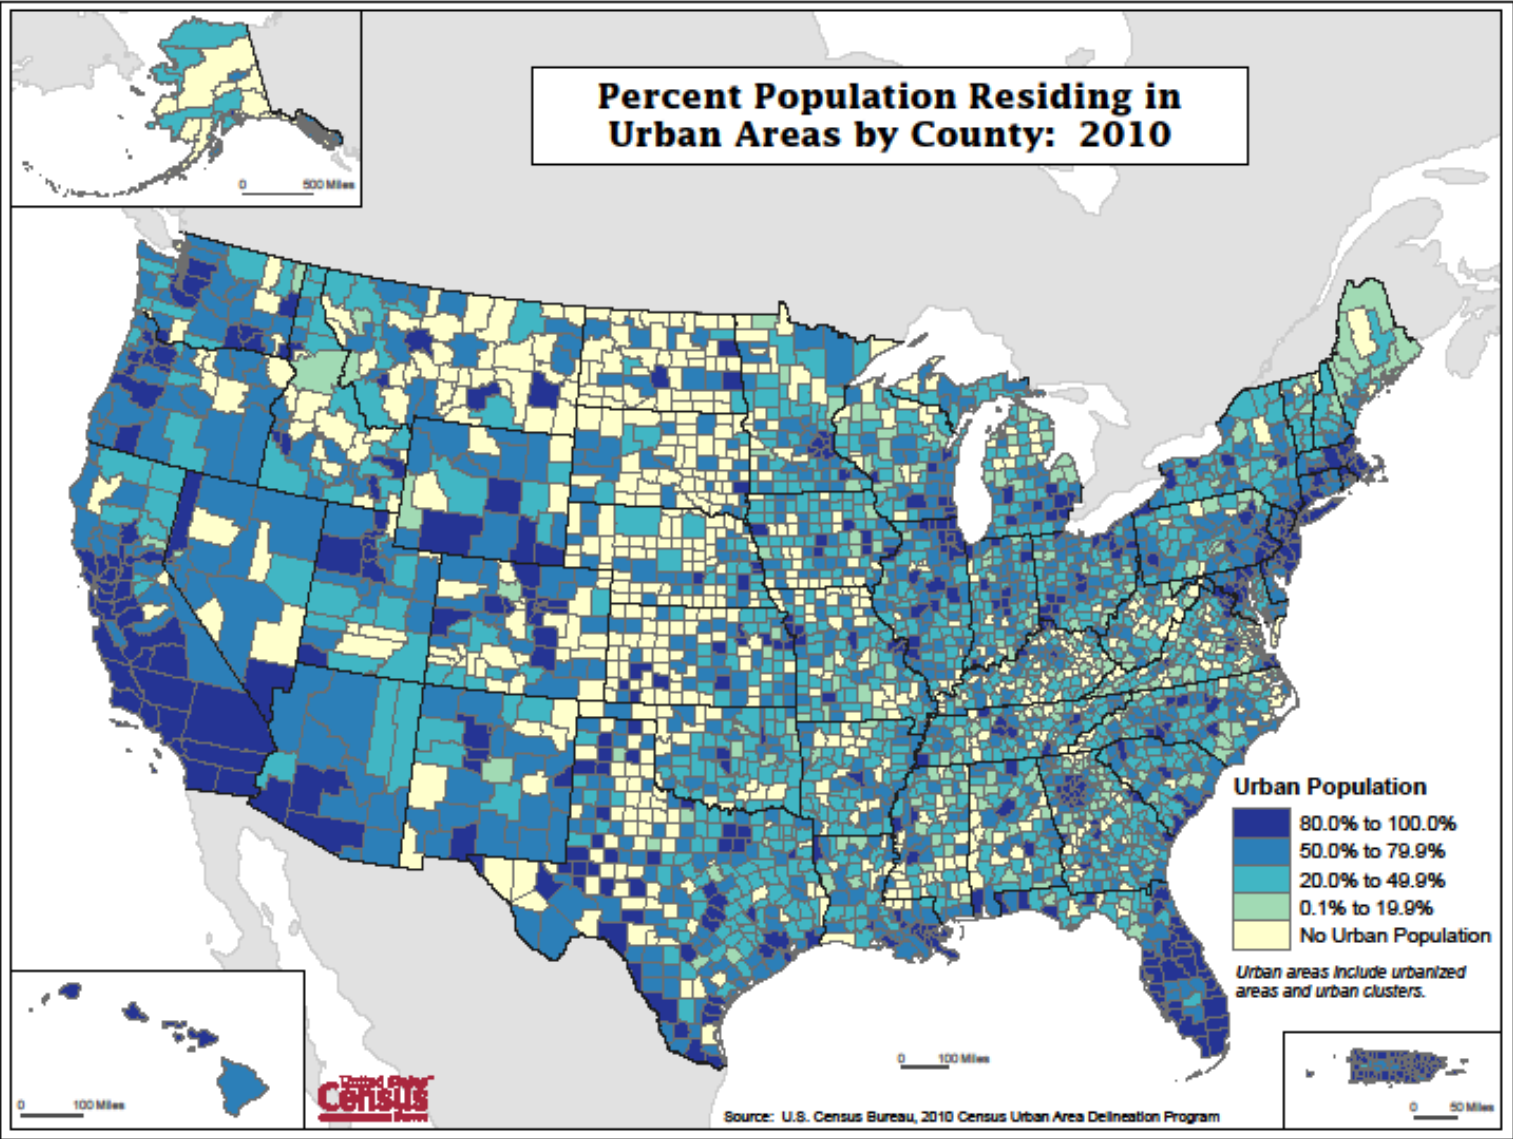

Supplement: Supplementary file 1 [file 27968022]
